# Supplementary material for: Redox Profiling Reveals Clear Differences between Molecular Patterns of Wound Fluids from Acute and Chronic Wounds
Source: Hindawi journal article supplement (doi:10.1155/2018/5286785), 2018-01-01

**Figure S1**

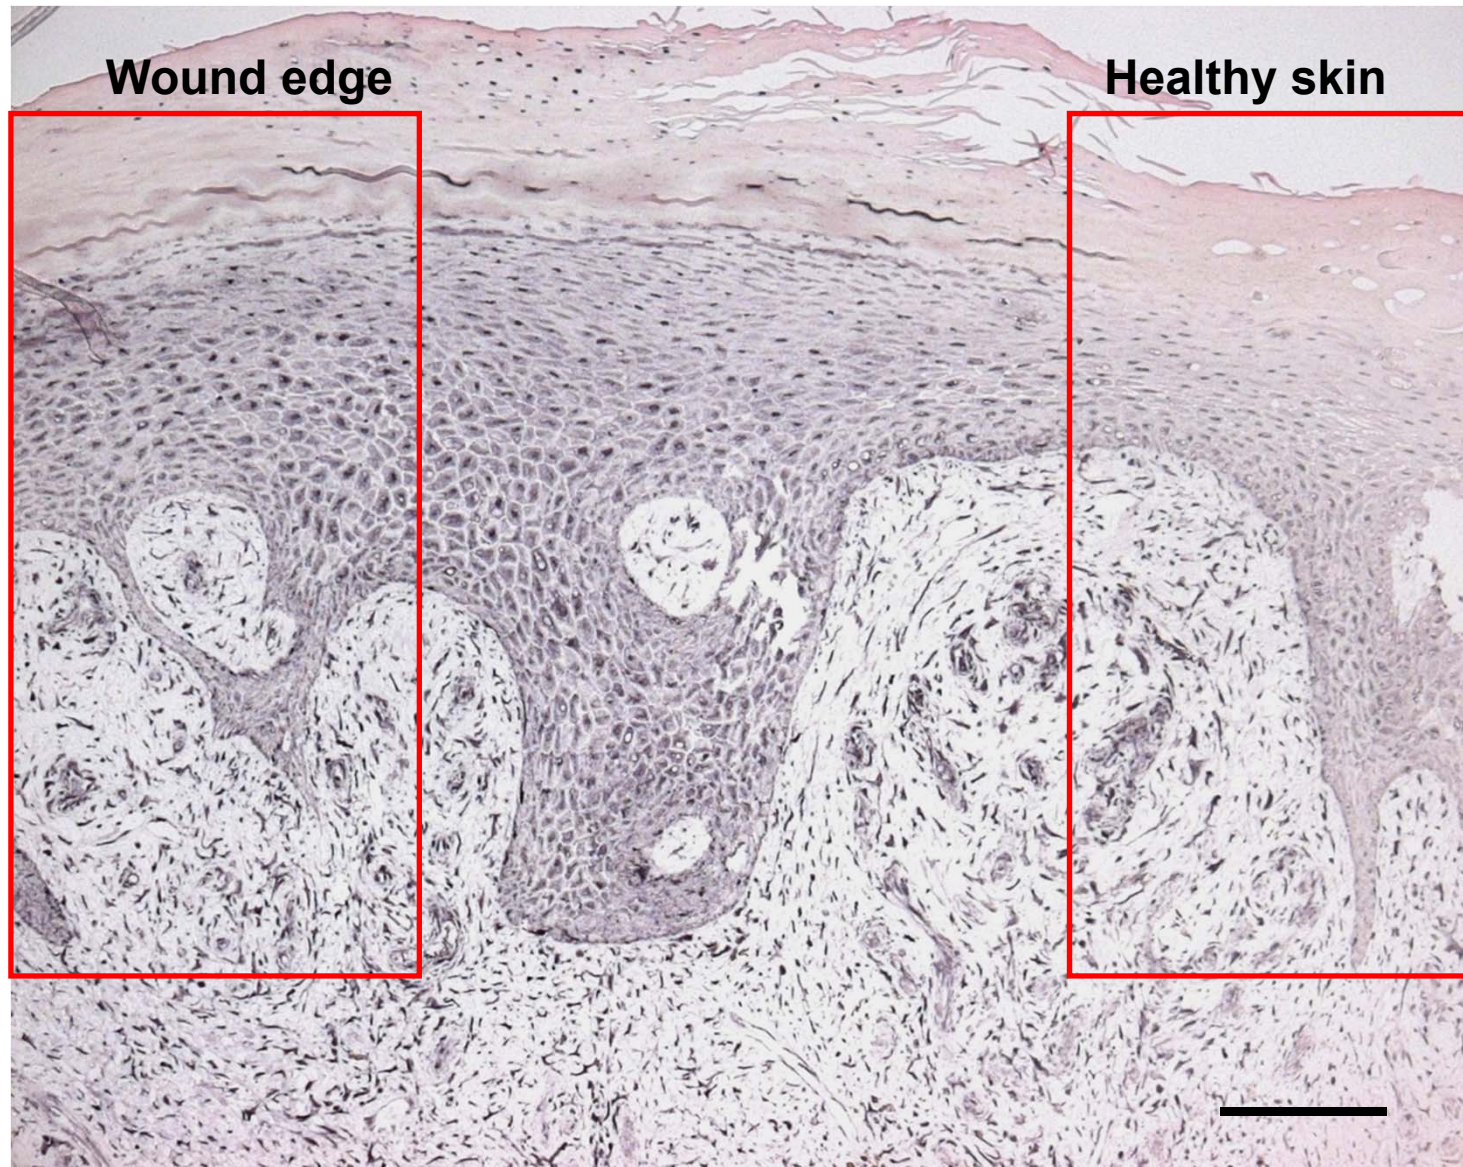

**Figure S2**

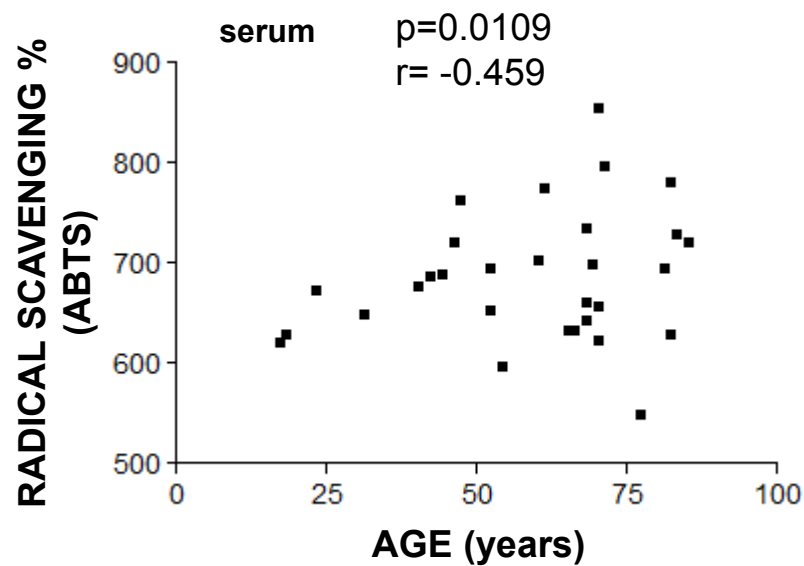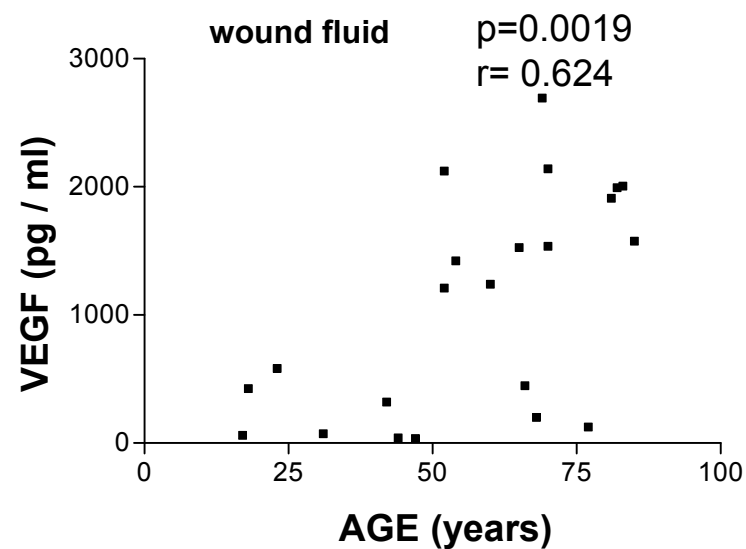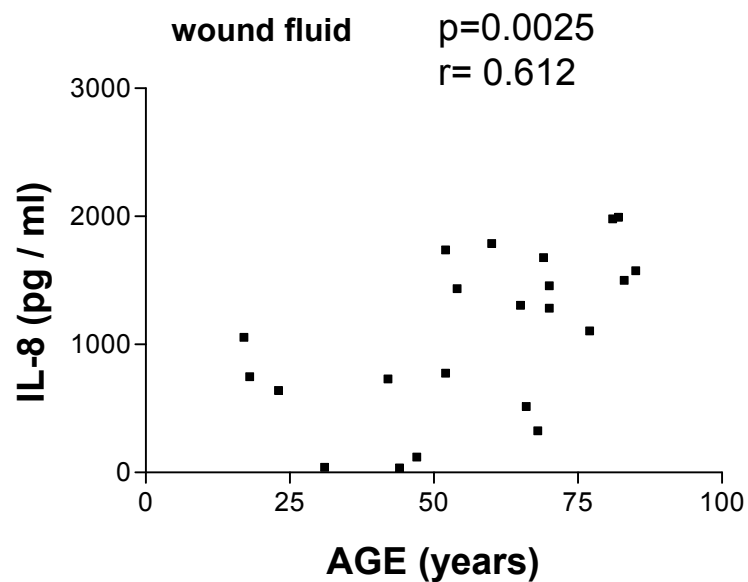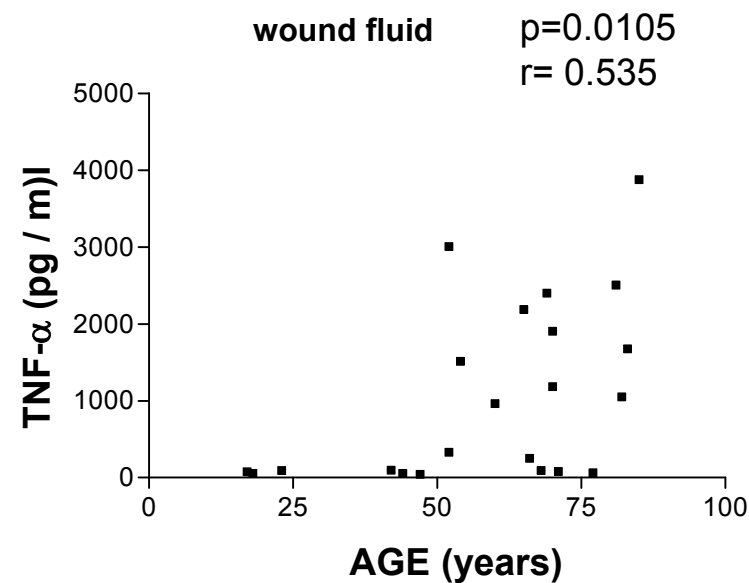

Supplement: f1 [file 5286785.f1.pdf]
